# Supplementary material for: The type I ribosome-inactivating protein α-MMC induced significant apoptosis of lung cancer A549 and 95-D cells by activating the caspase cascade through TNF signaling pathway
Source: Frontiers journal article supplement (doi:10.3389/fphar.2025.1529151), 2025-06-09

## Supplementary Material

### 1 Graphical Abstract

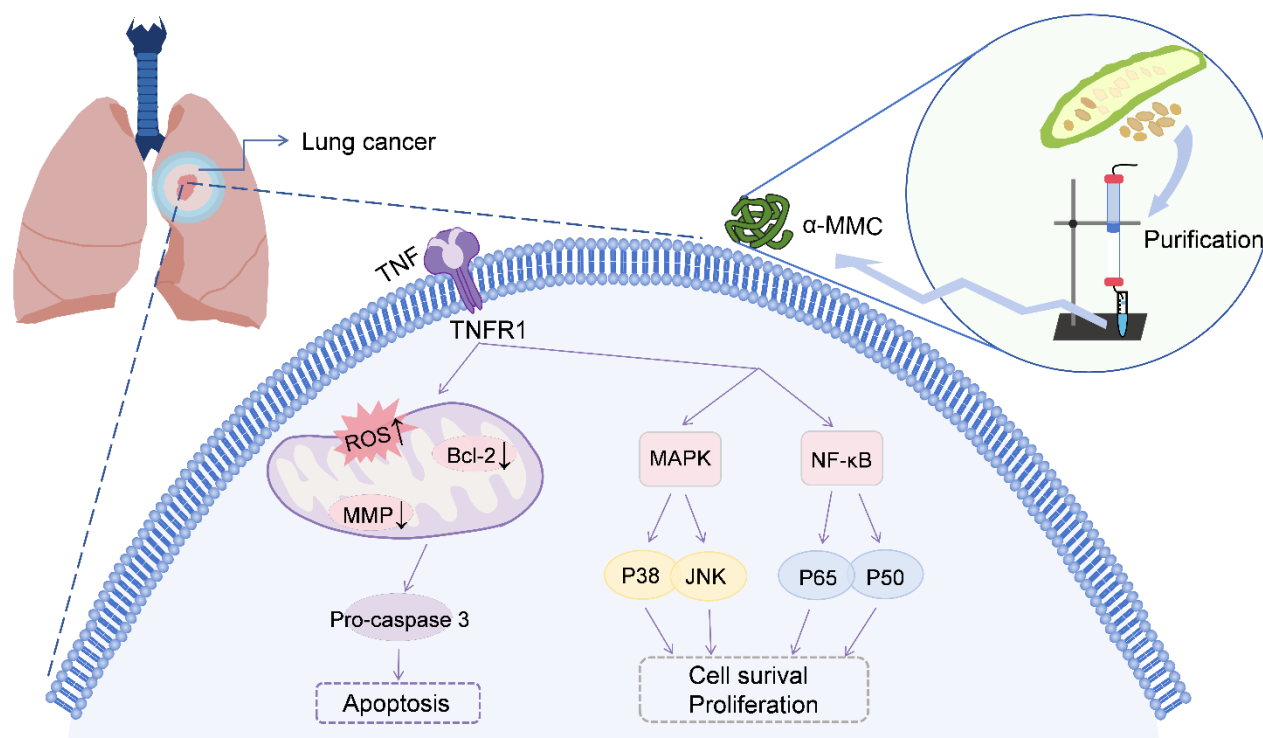

### 2 Supplementary Figures and Tables

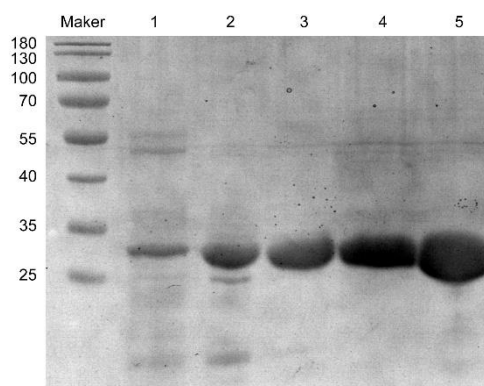

**Figure S1. The profile of different purification stages by SDS-PAGE.** Lane 1: Crude extracts; Lane 2: 30~60% A.S. precipitation; Lane 3: SP-Sepharose FF chromatography; Lane 4: Sephacryl S-100 chromatography; Lane 5: SP-Sepharose FF chromatography

**Table S1. Purification of  $\alpha$ -MMC from bitter melon seeds.**

| <b>Steps</b>                   | <b>Total volume (mL)</b> | <b>Protein conc. (mg/mL)</b> | <b>Protein content (mg)</b> | <b>Recovery of Proteins (%)</b> |
|--------------------------------|--------------------------|------------------------------|-----------------------------|---------------------------------|
| Crude extracts                 | 375                      | -                            | -                           | -                               |
| pH3.6 treatment                | 375                      | 16.39                        | 6146.25                     | 100                             |
| 30~60% A.S. precipitation      | 90                       | 14.39                        | 1295.10                     | 21.07                           |
| SP-Sepharose FF chromatography | 110                      | 4.02                         | 442.20                      | 7.19                            |
| Sephacryl S-100 chromatography | 208                      | 0.96                         | 199.68                      | 3.25                            |
| SP-Sepharose FF chromatography | 9                        | 6.29                         | 56.61                       | 0.92                            |

**Note:** Values reported are an average value of three preparations. The data of Protein content was quantified using the BCA kit.

### 3 Raw data from Western Blots

#### 3.1 Uncropped Western Blots of A549 cells about cell cycle regulatory proteins

Cyclin A

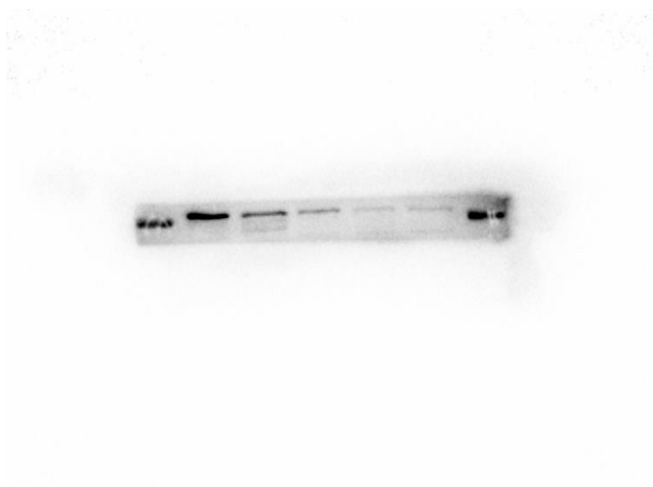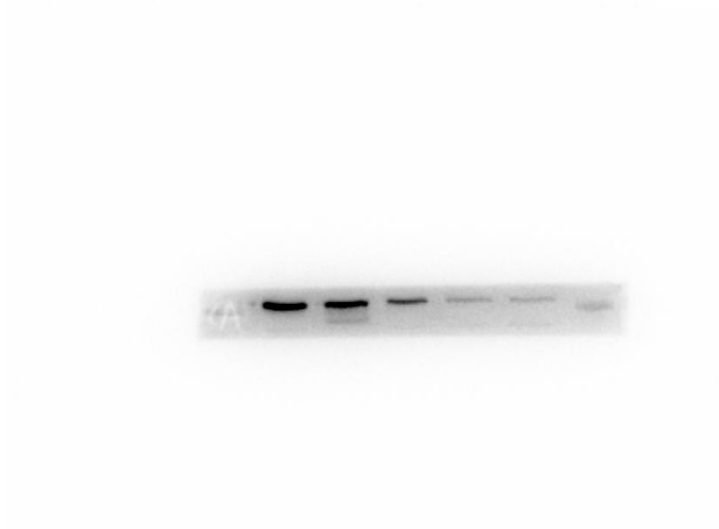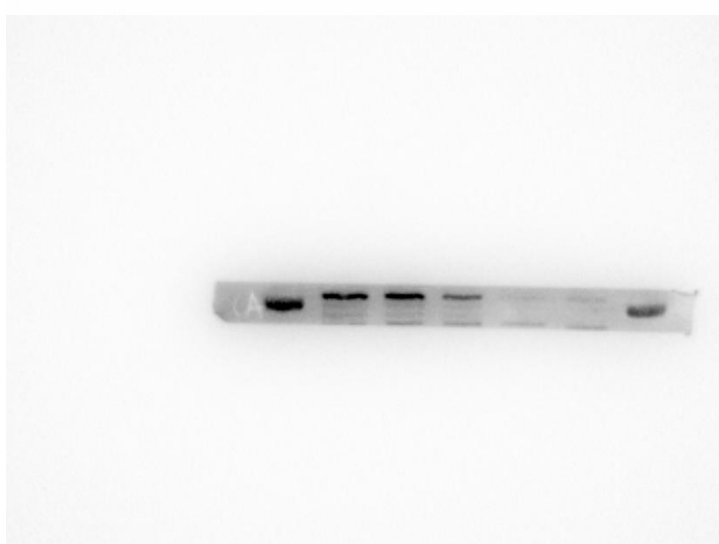

CDK2

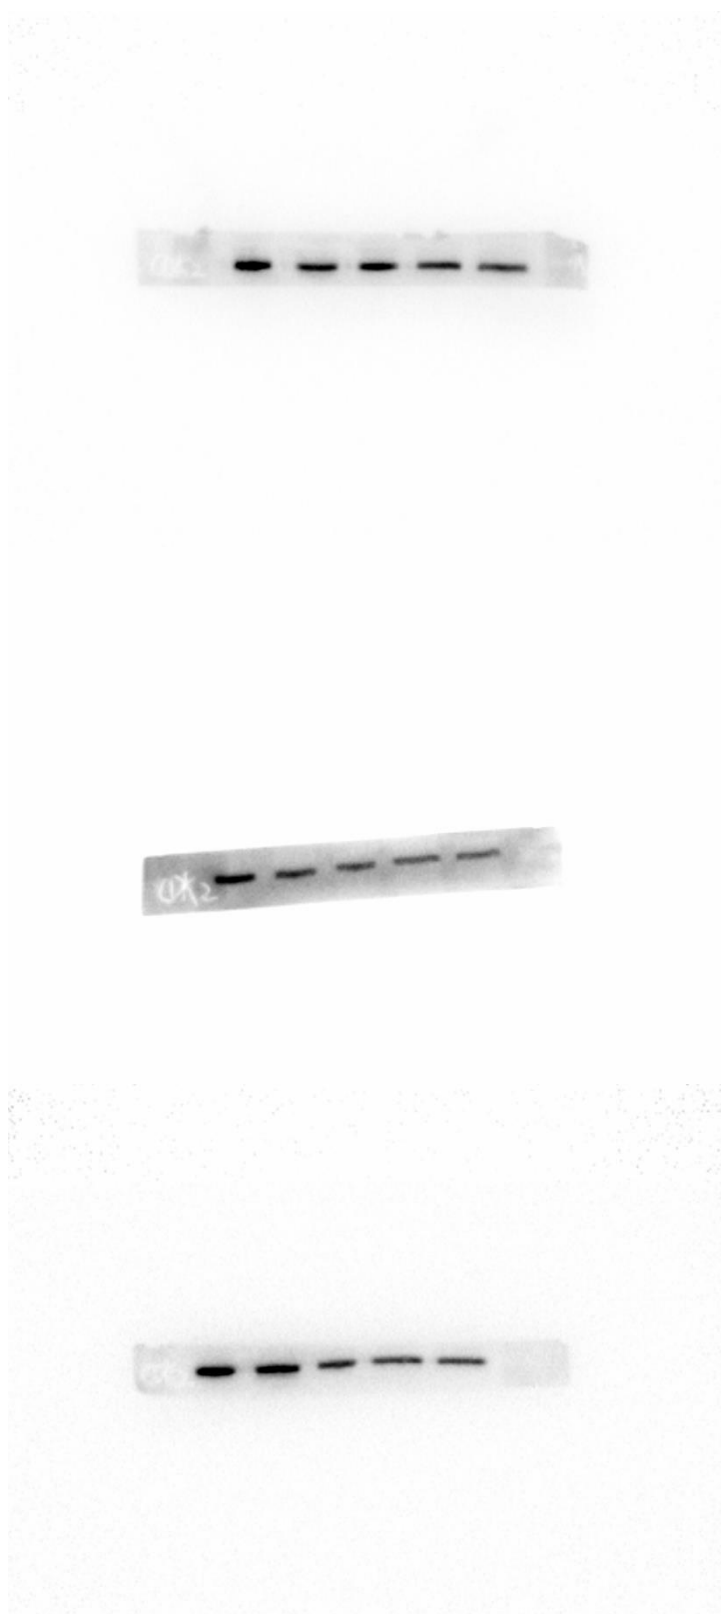

Cyclin D

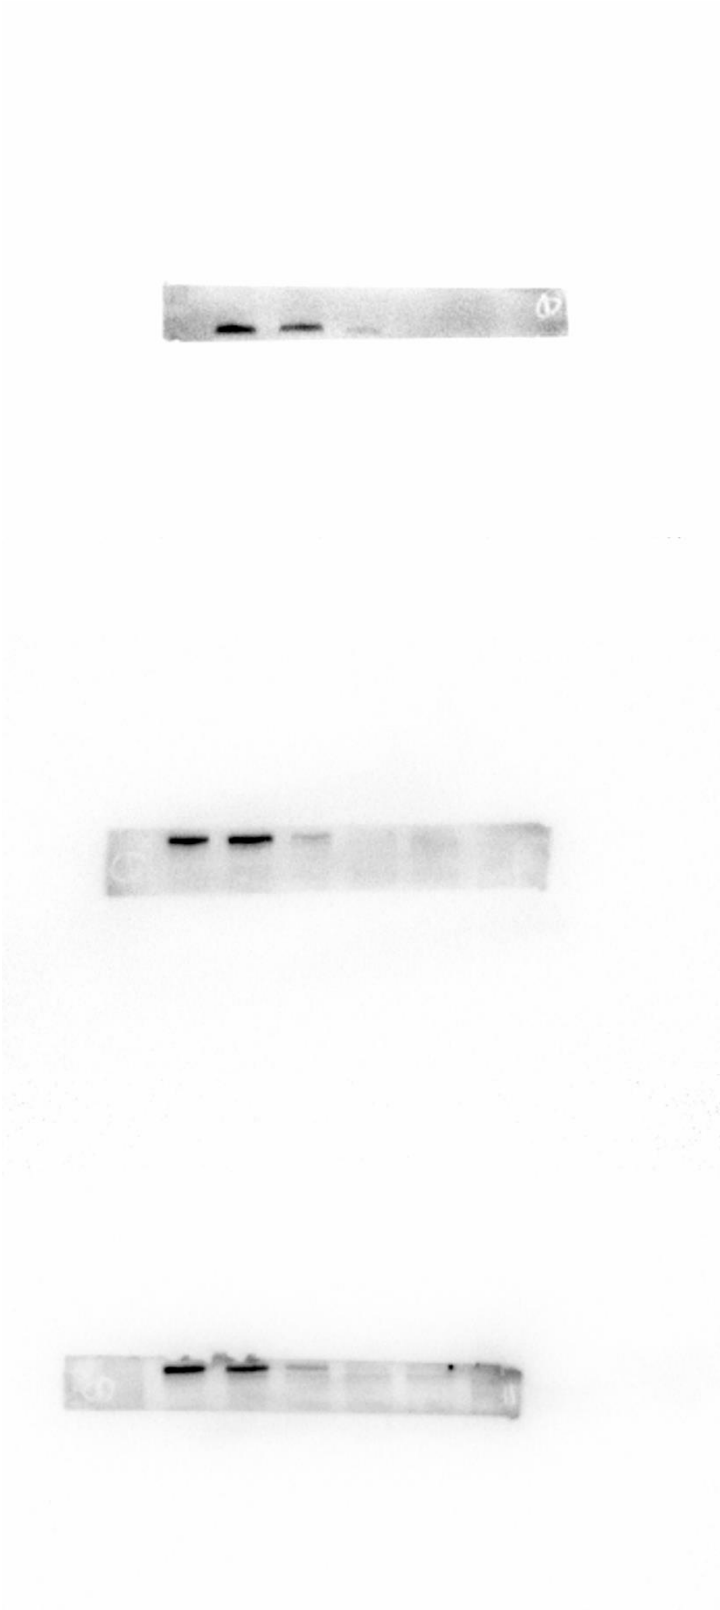

CDK4

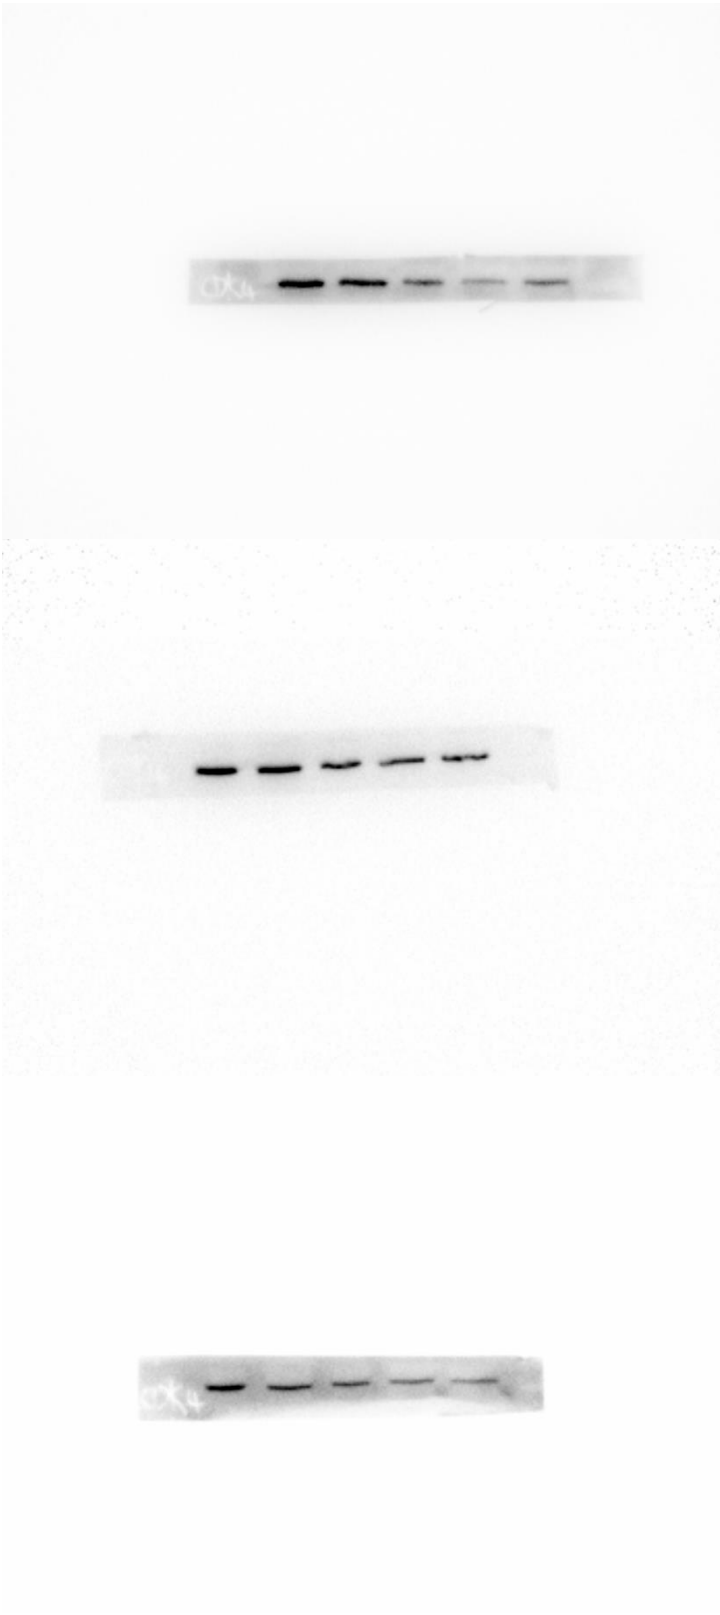

$\alpha$ -Tubulin

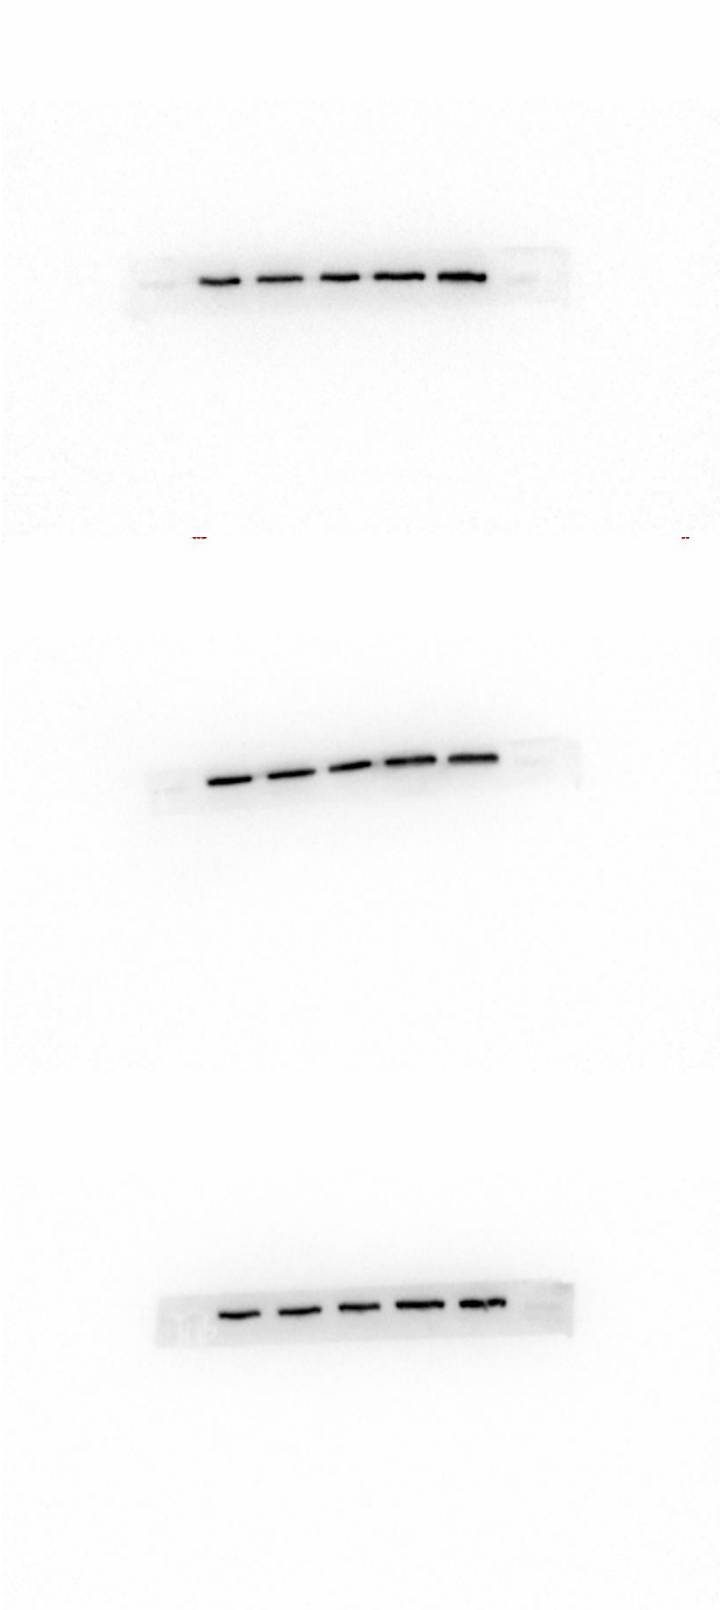

### 3.2 Uncropped Western Blots of 95-D cells about cell cycle regulatory proteins

Cyclin A

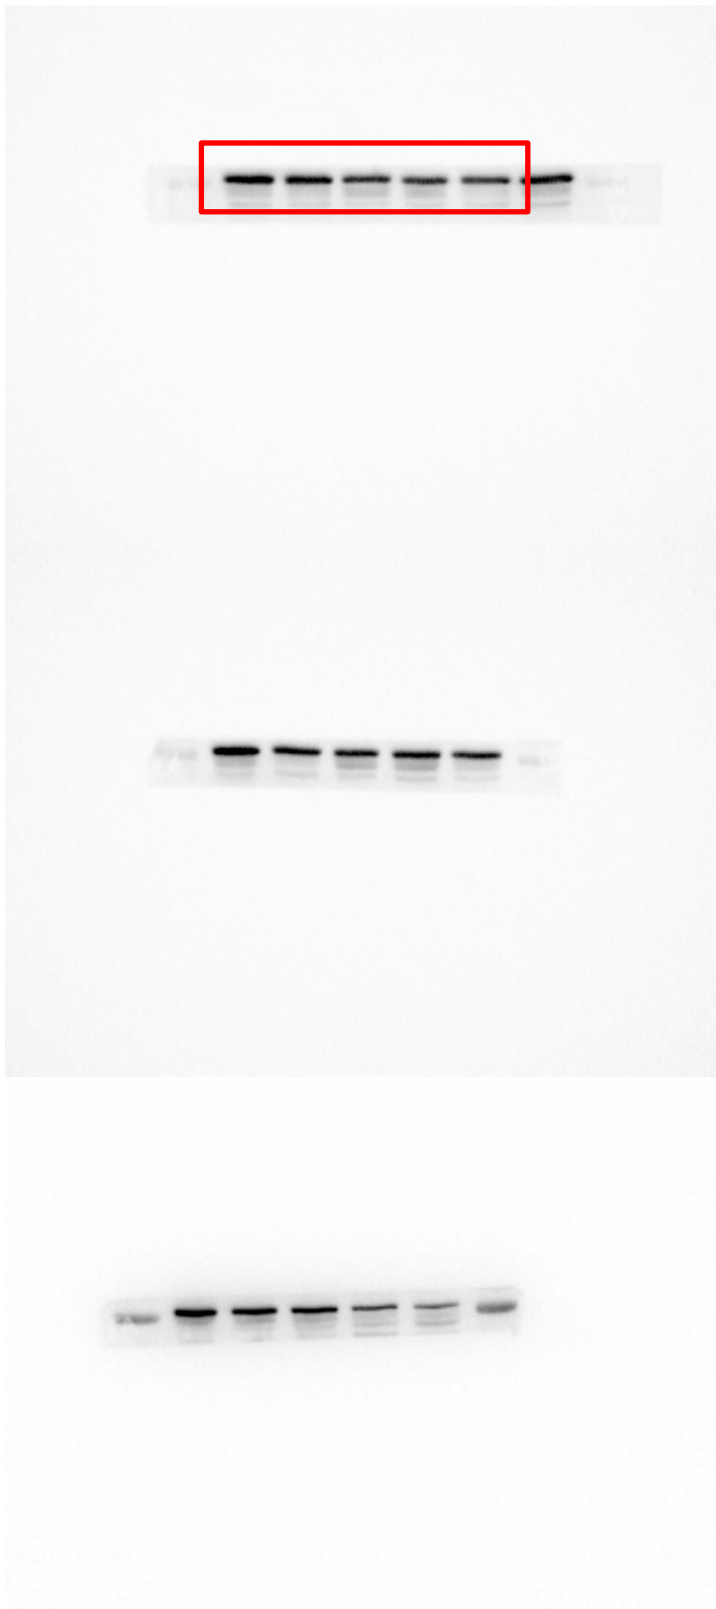



CDK2

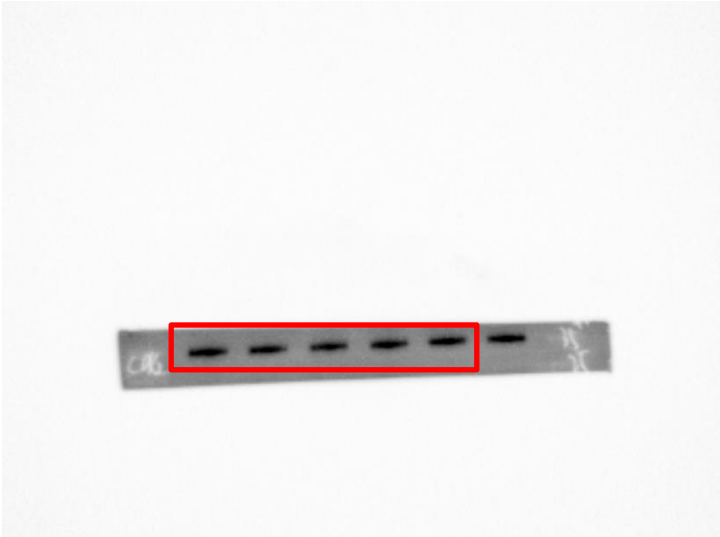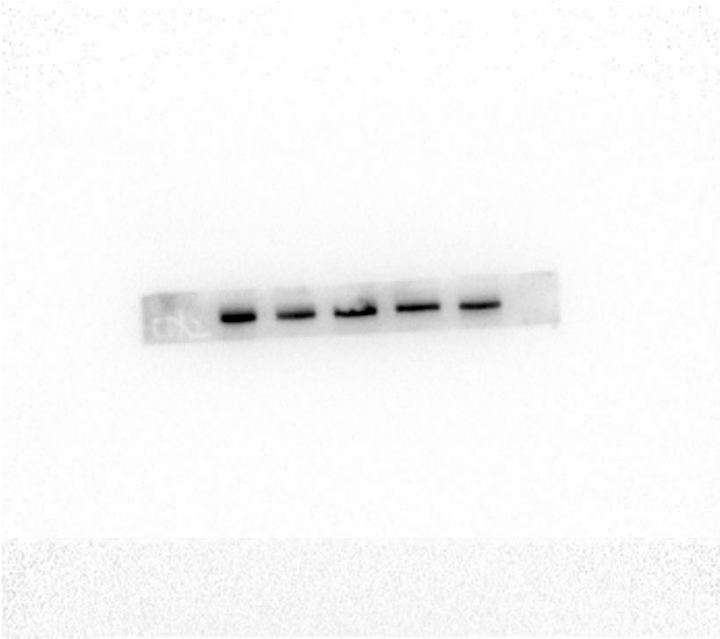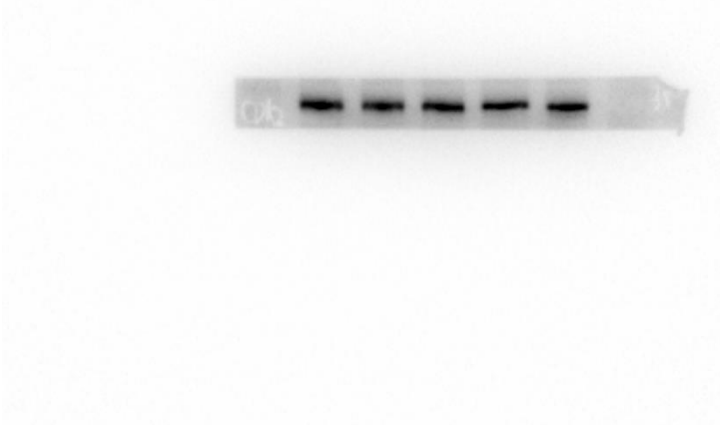

Cyclin D

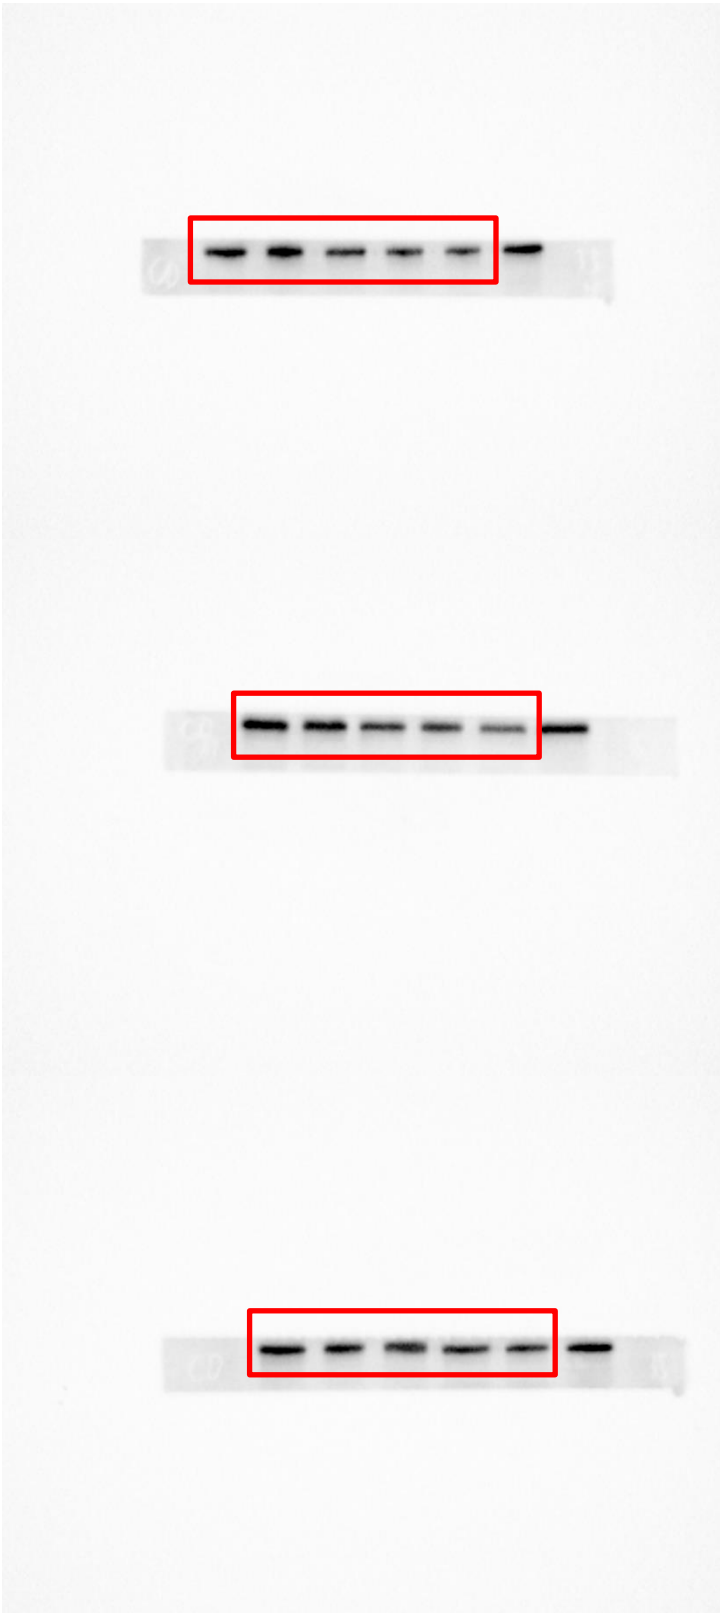

CDK4

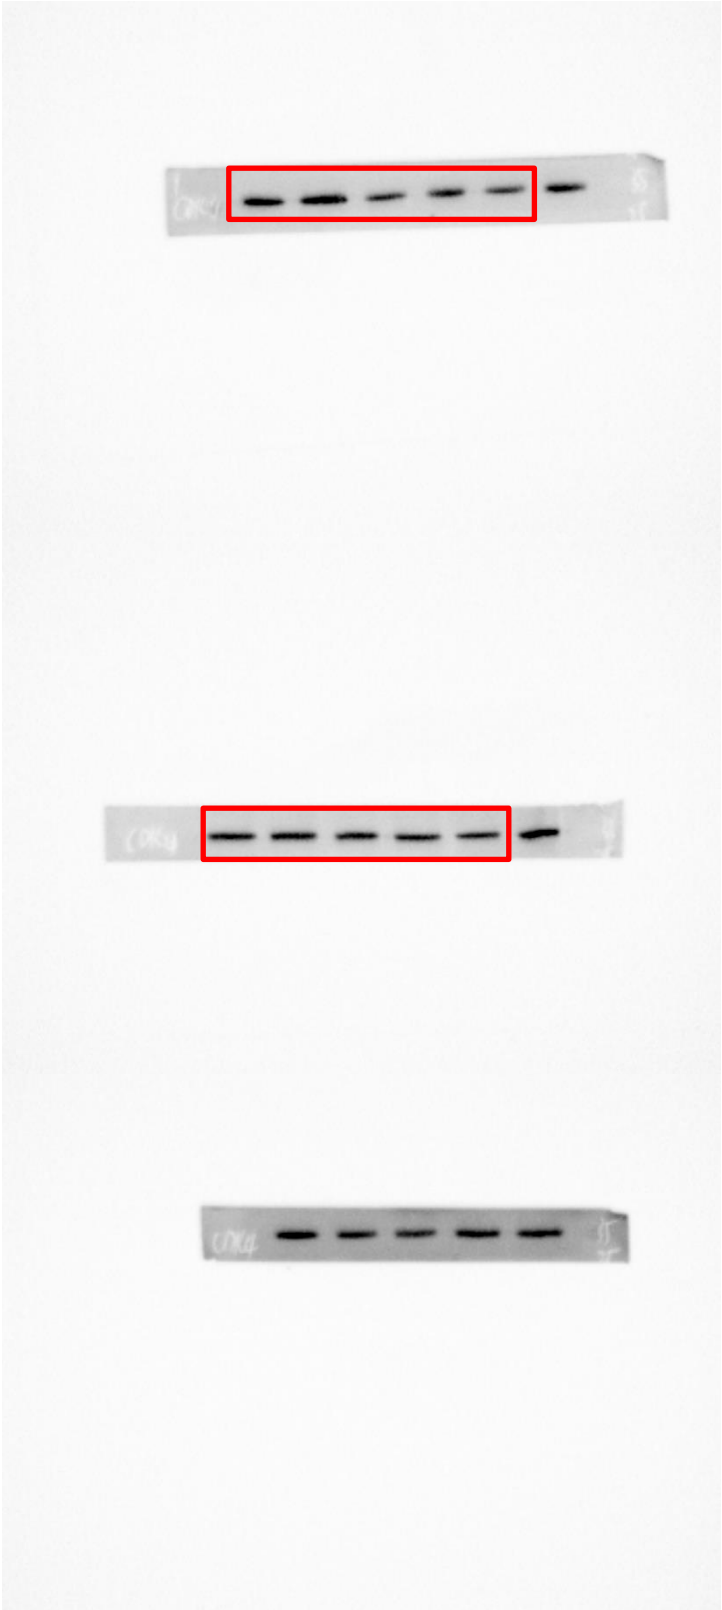

$\alpha$ -Tubulin

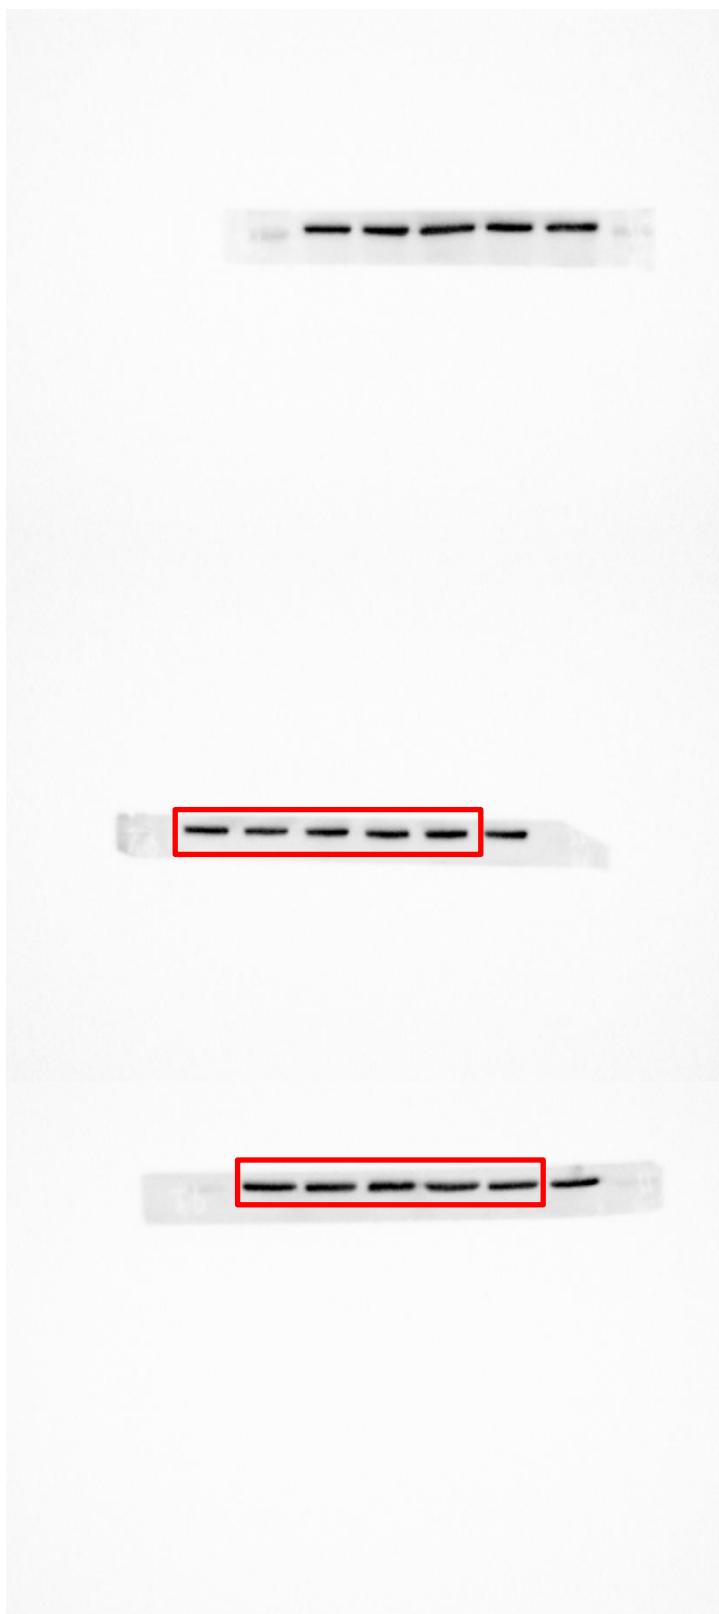

**3.3    Uncropped Western Blots of A549 cells associated with apoptosis-regulating proteins**

PARP1

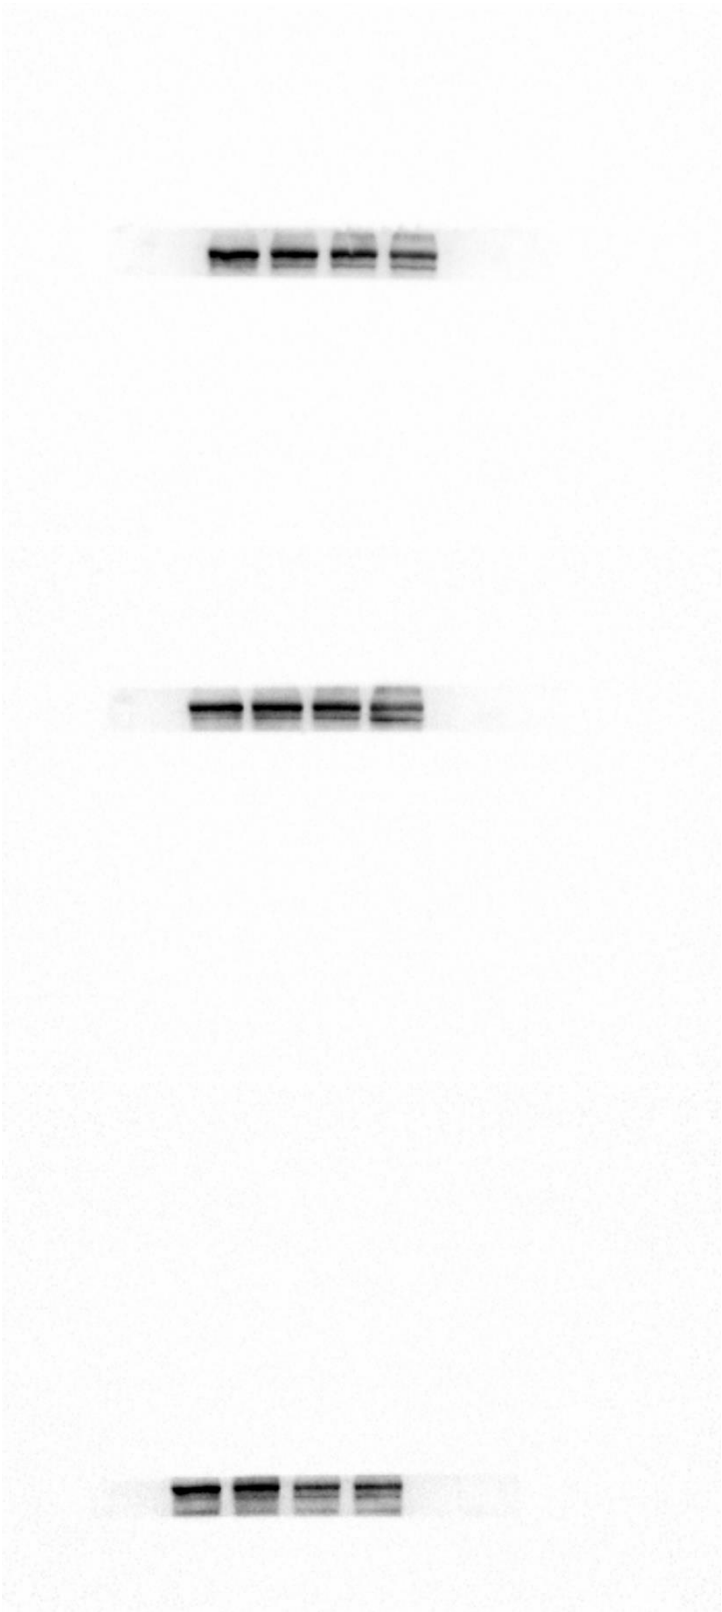

pro-Caspase 3

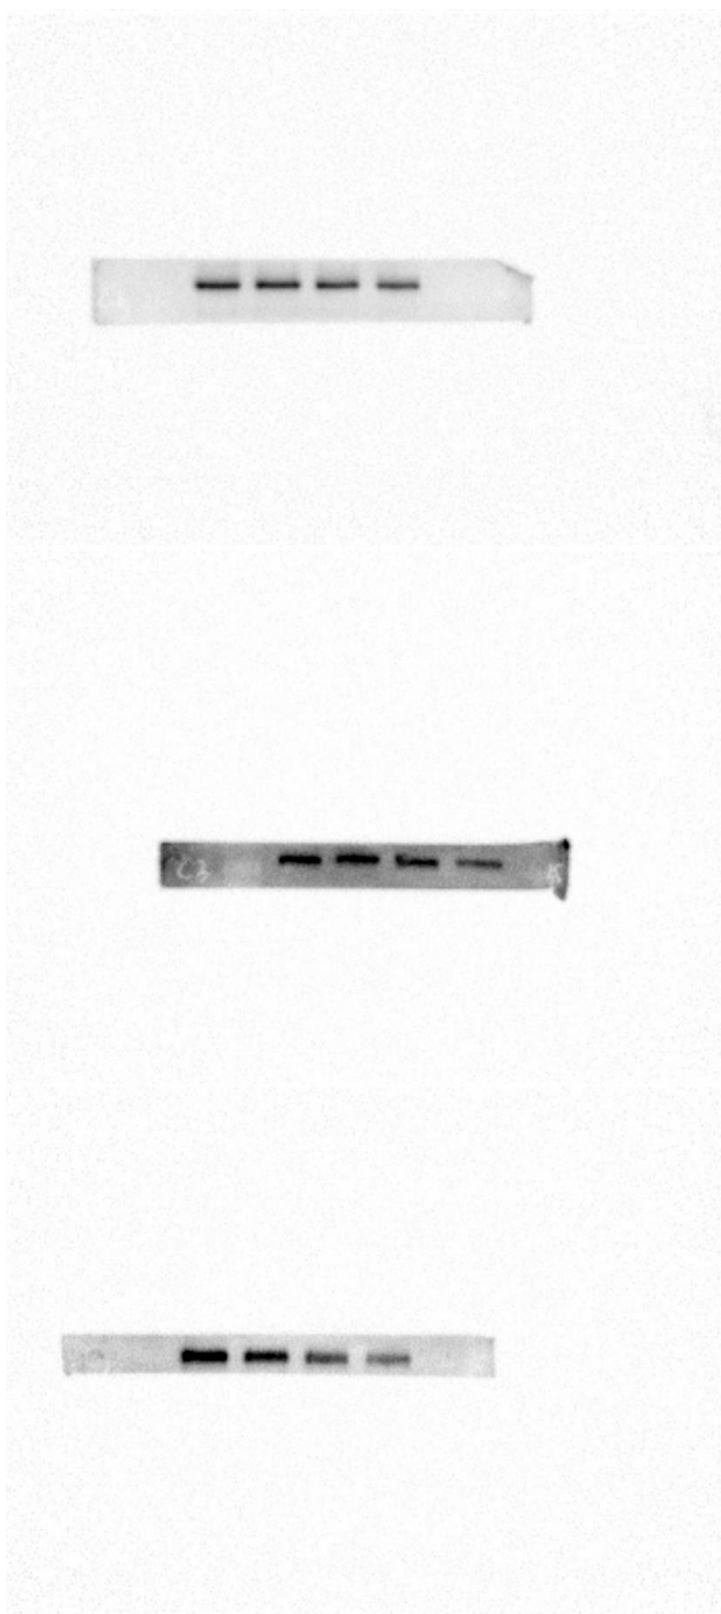

pro-Caspase 9

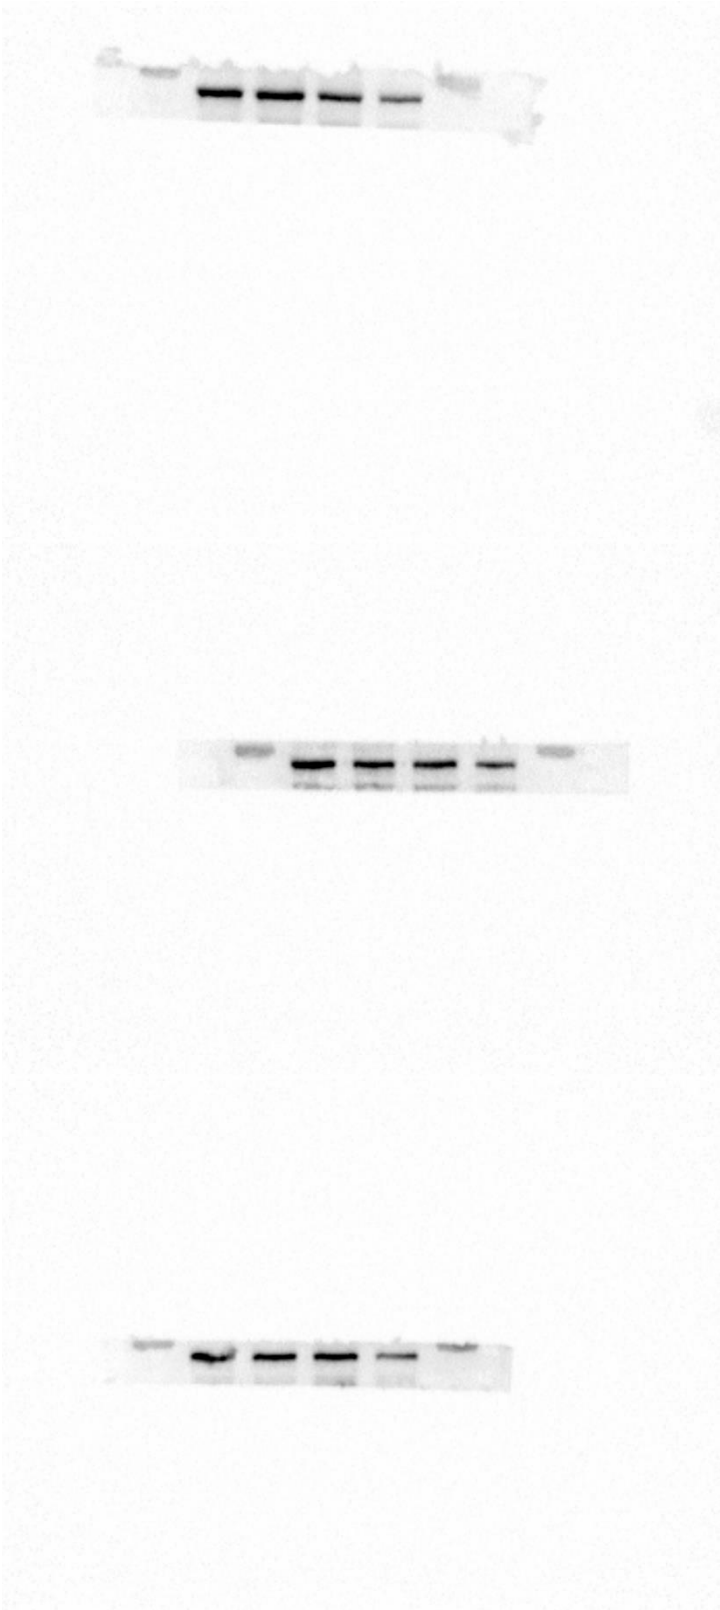

Bcl-2

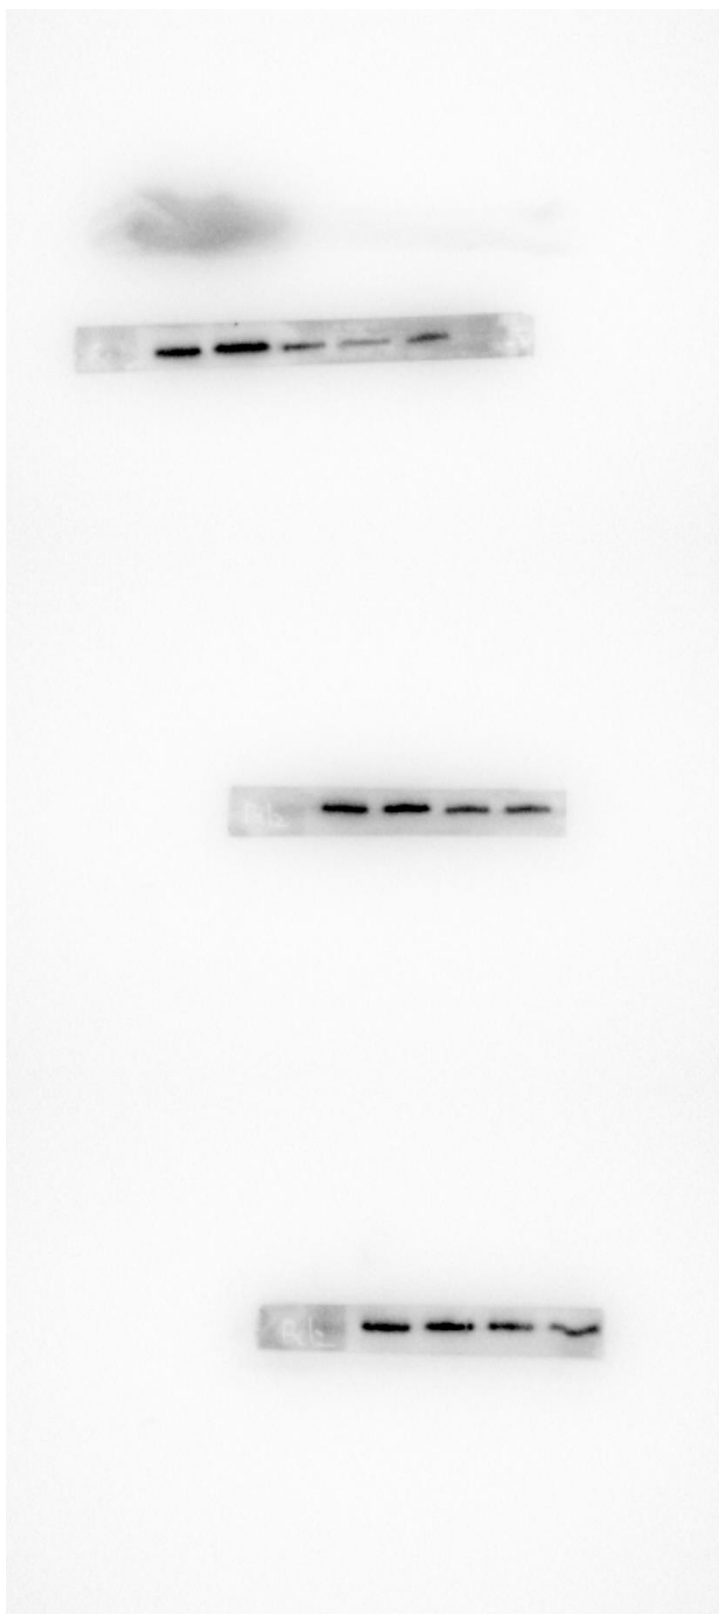



Bax

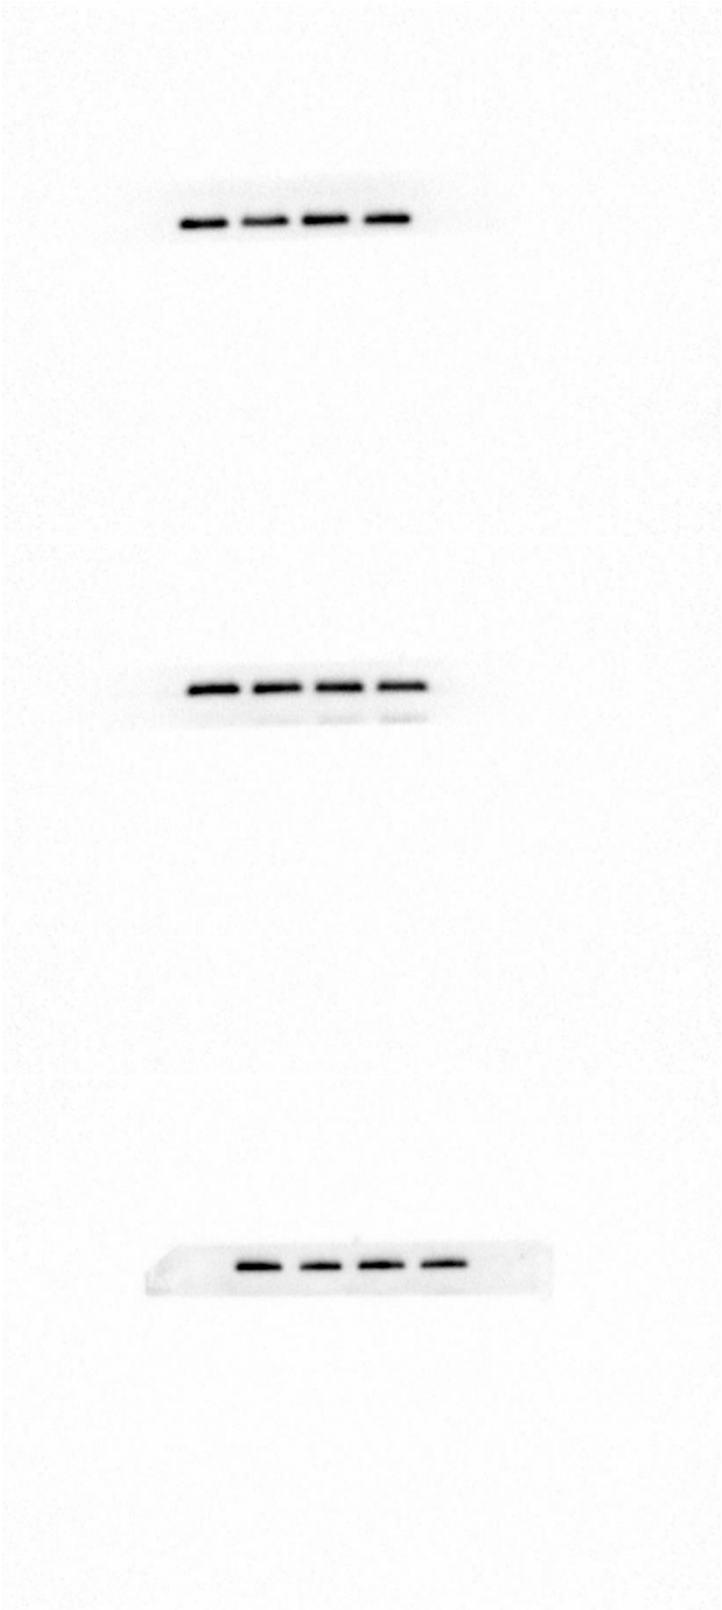

$\alpha$ -Tubulin

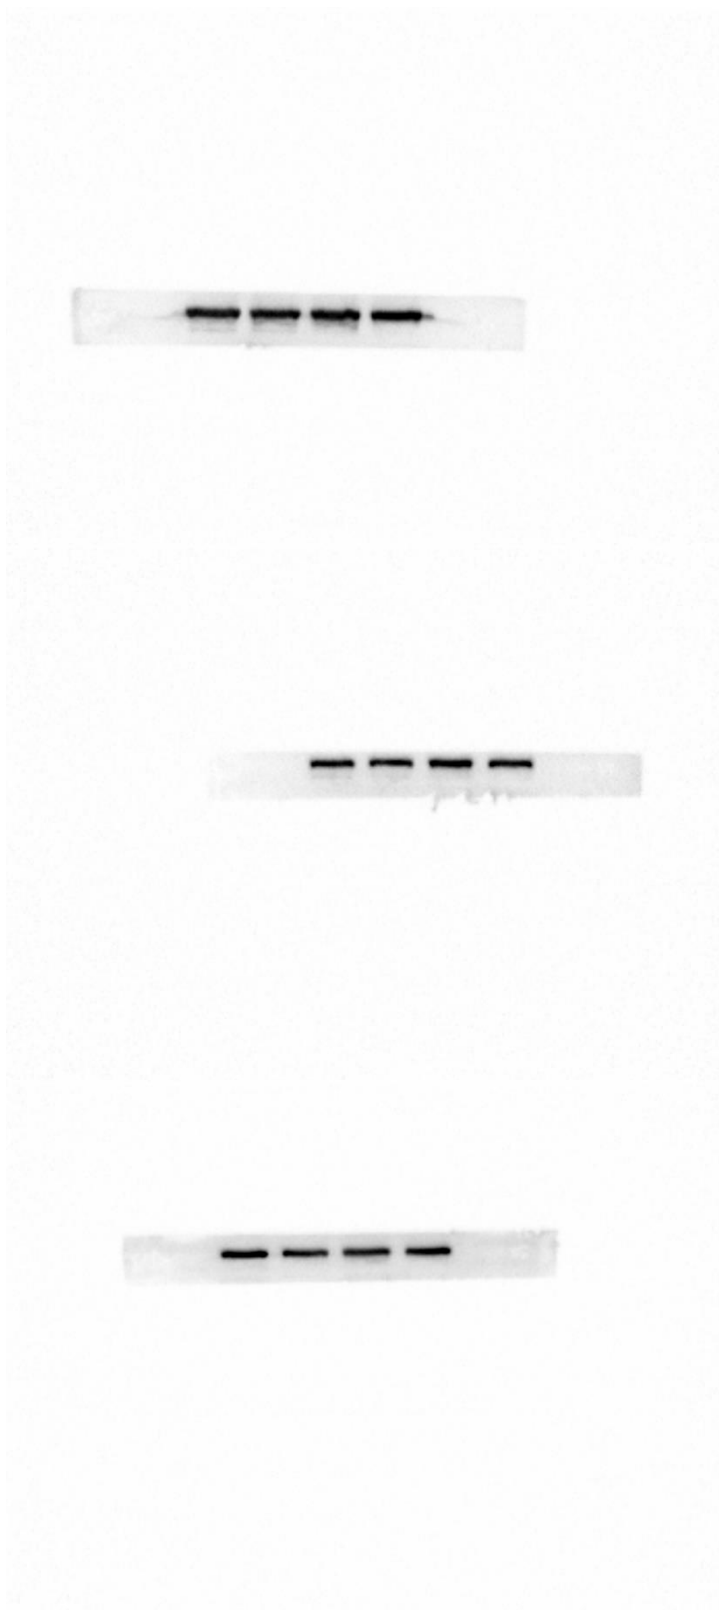

pro-Caspase 8

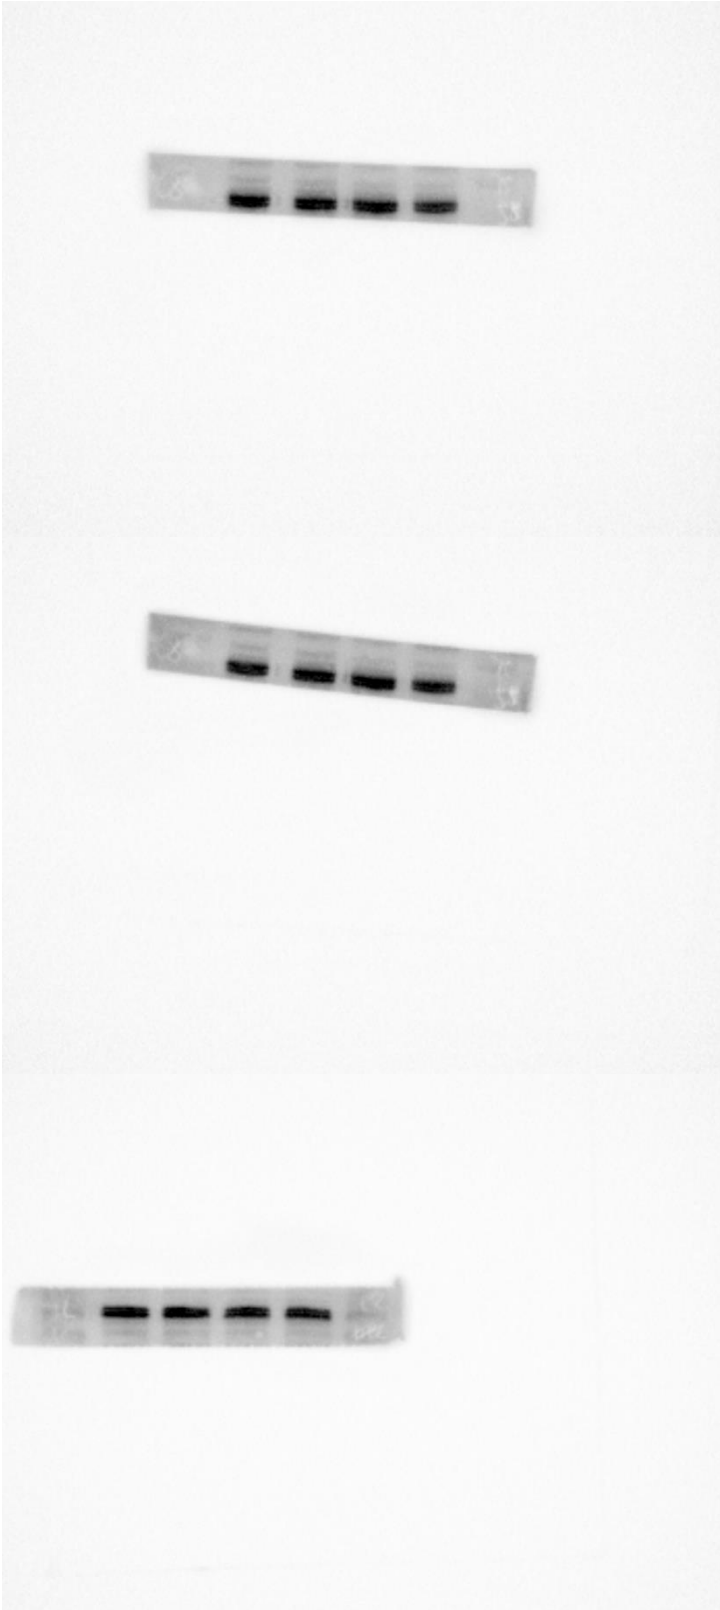

CHOP

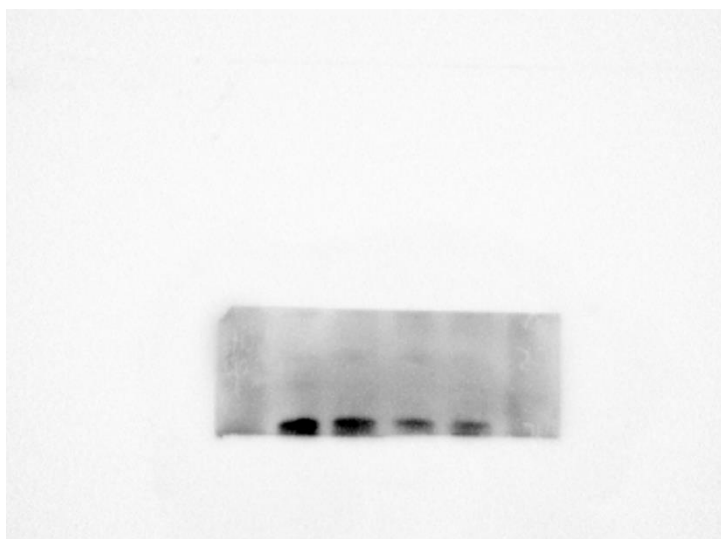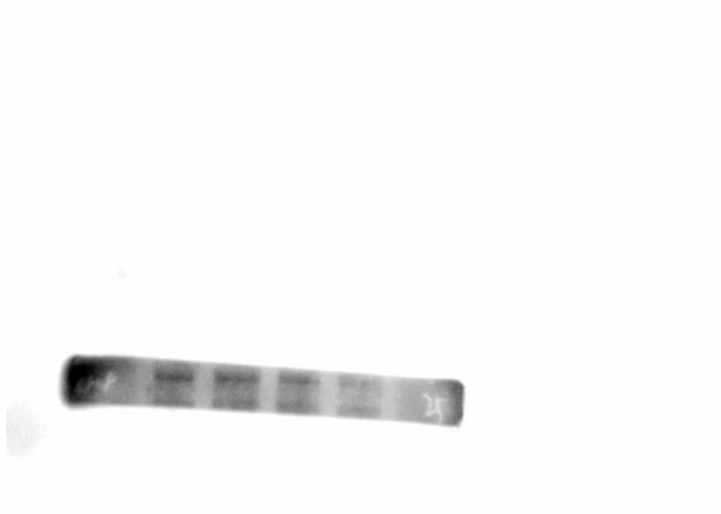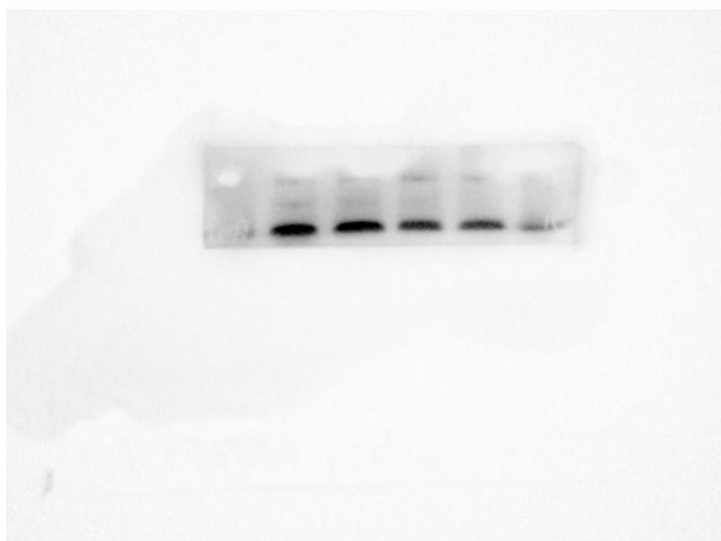

GRP78

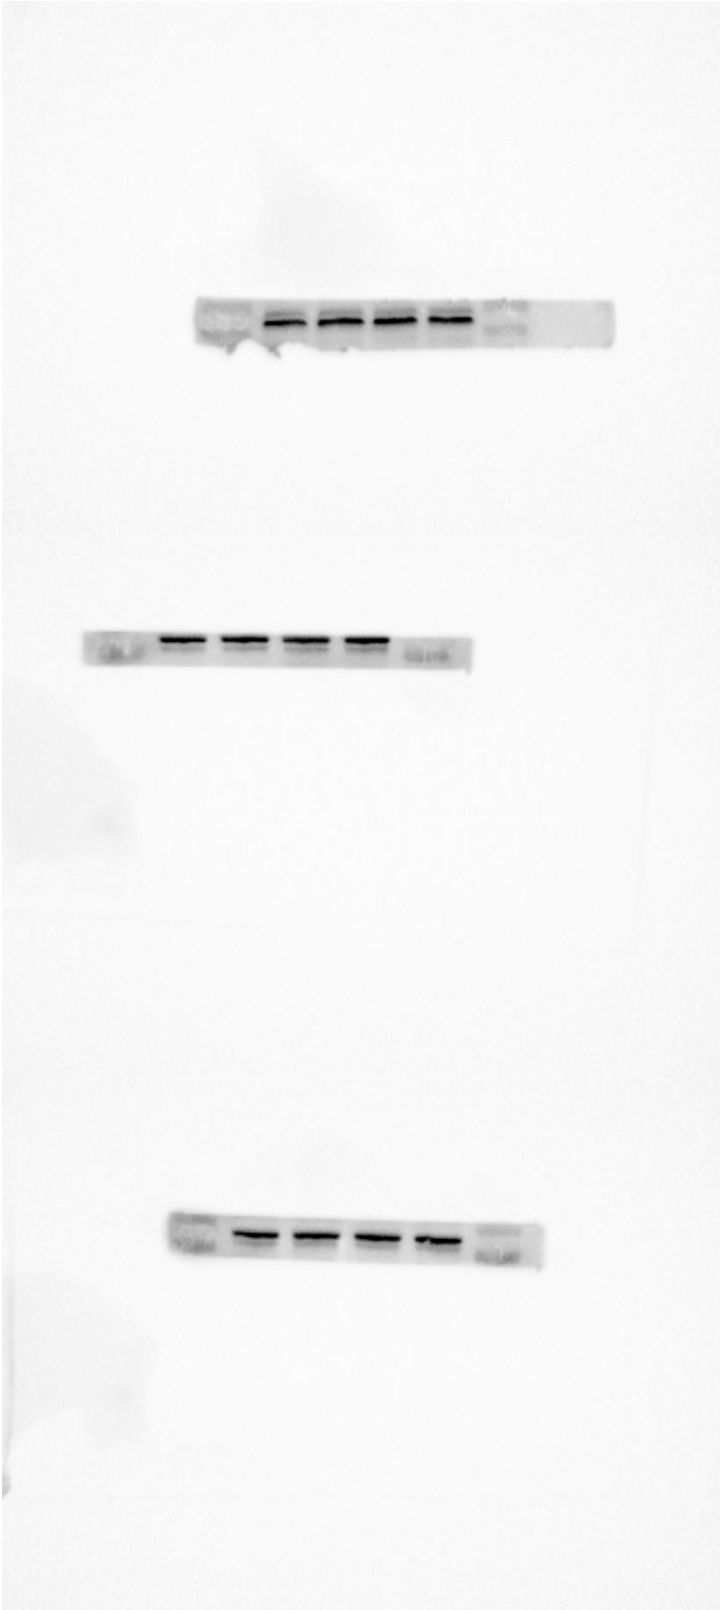

GAPDH

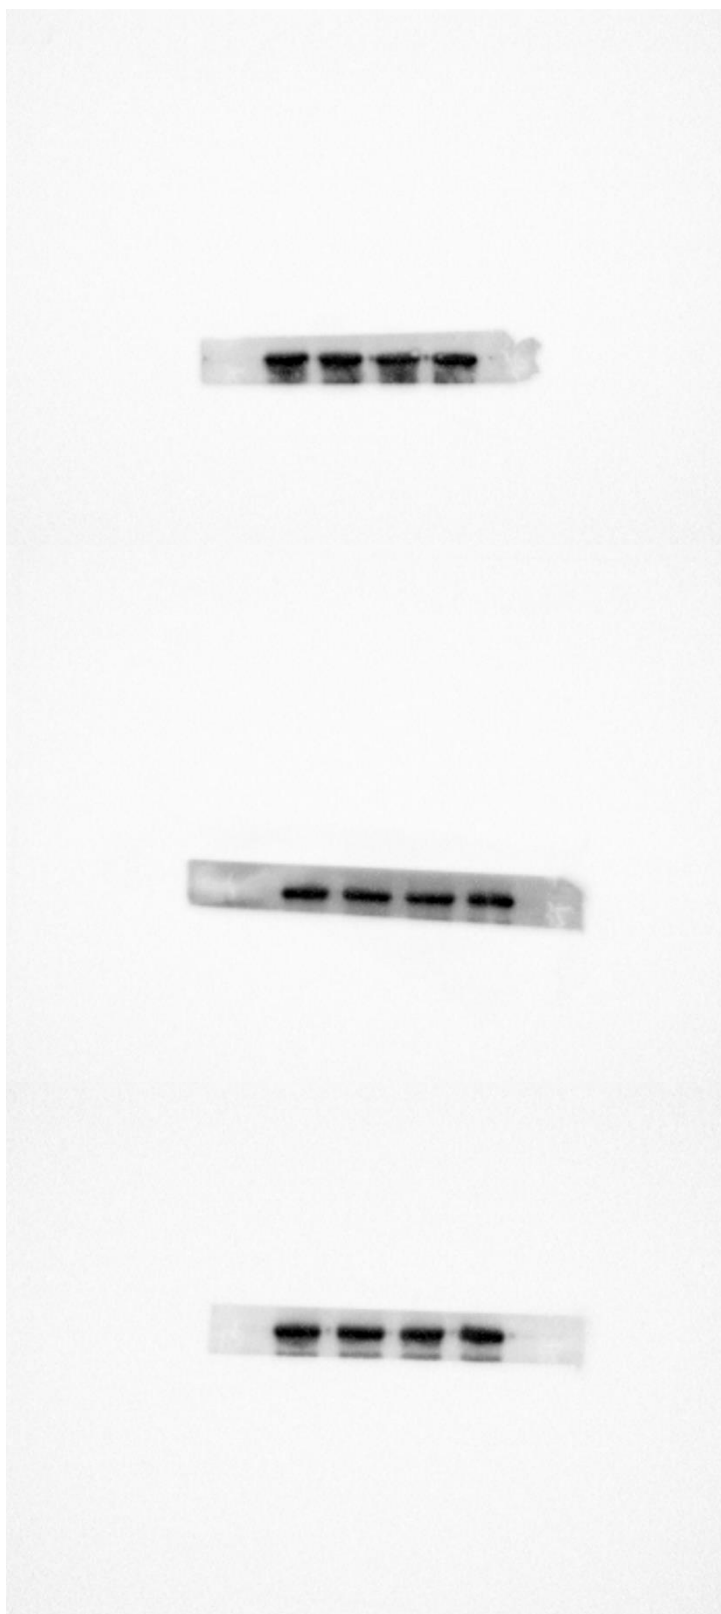

### 3.4 Uncropped Western Blots of proteins associated with the TNF signaling pathway in A549 cells

P65

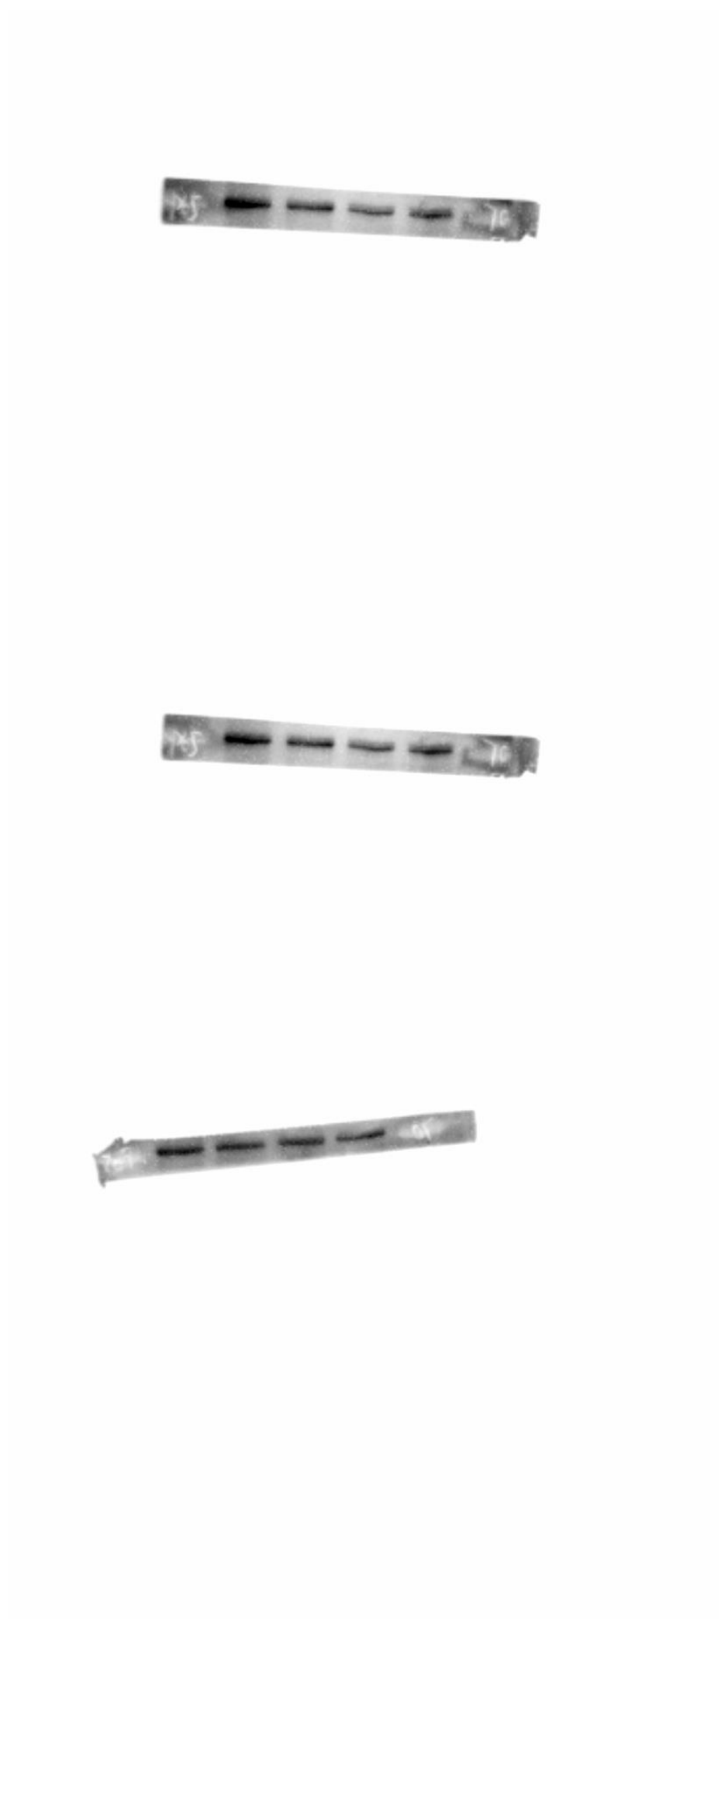

P50

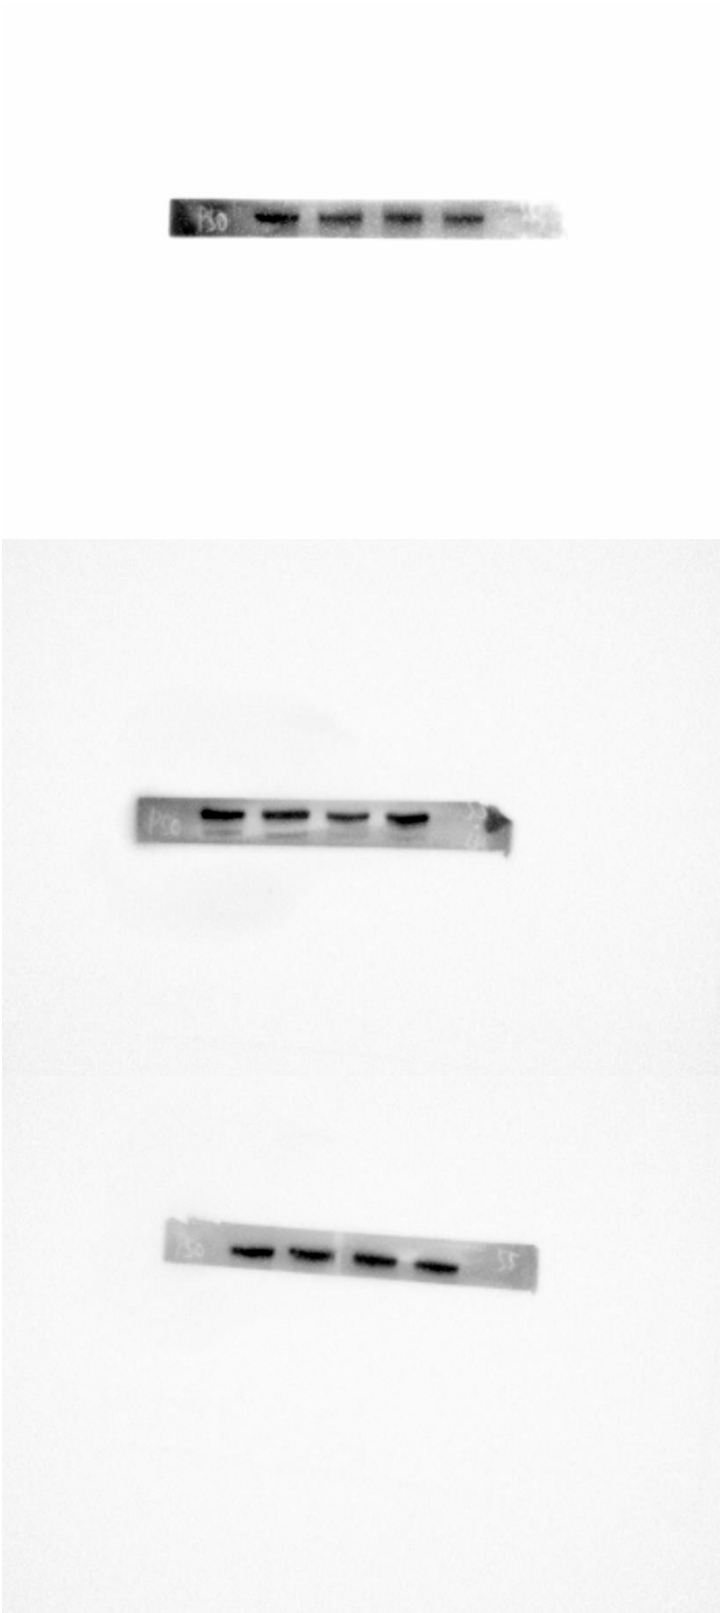



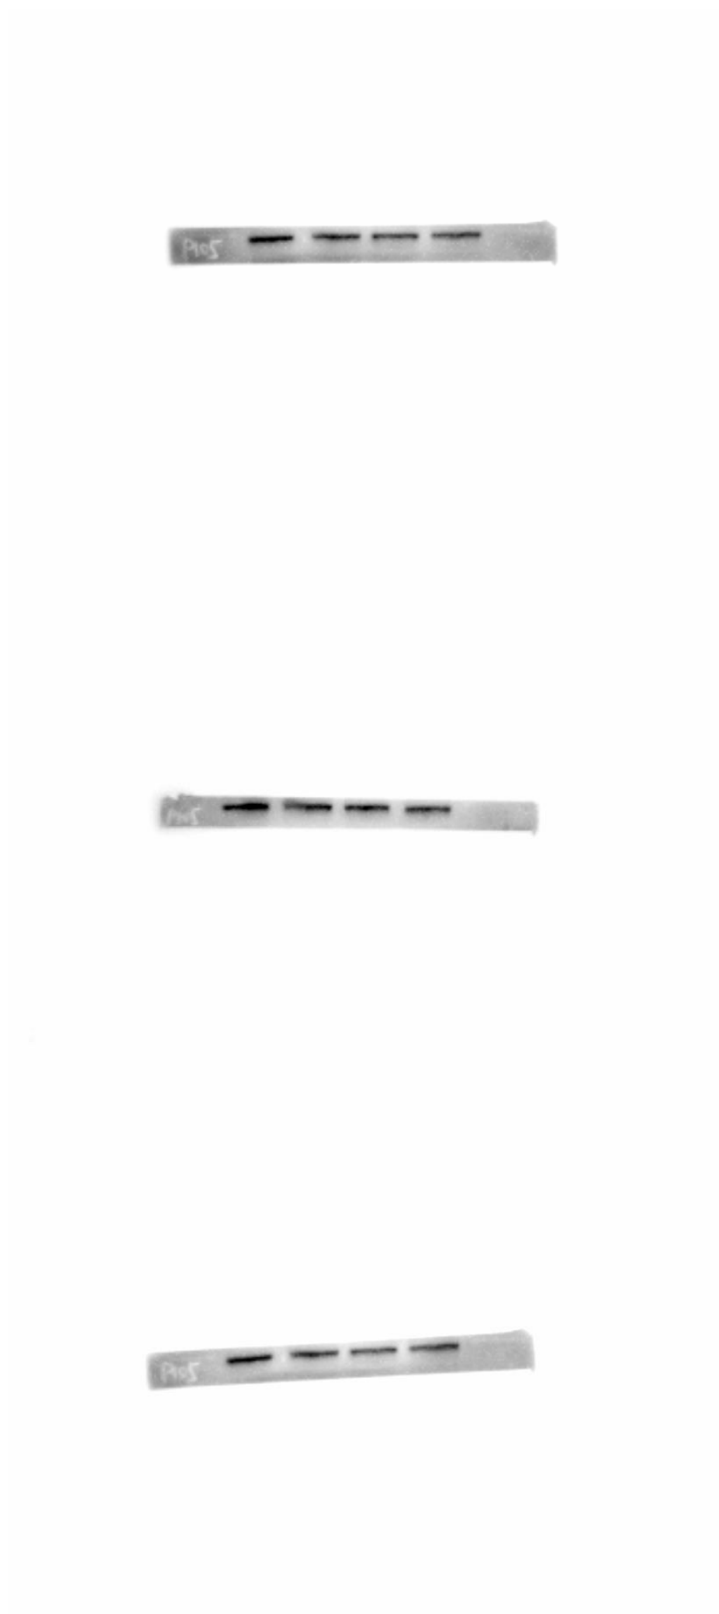

P38

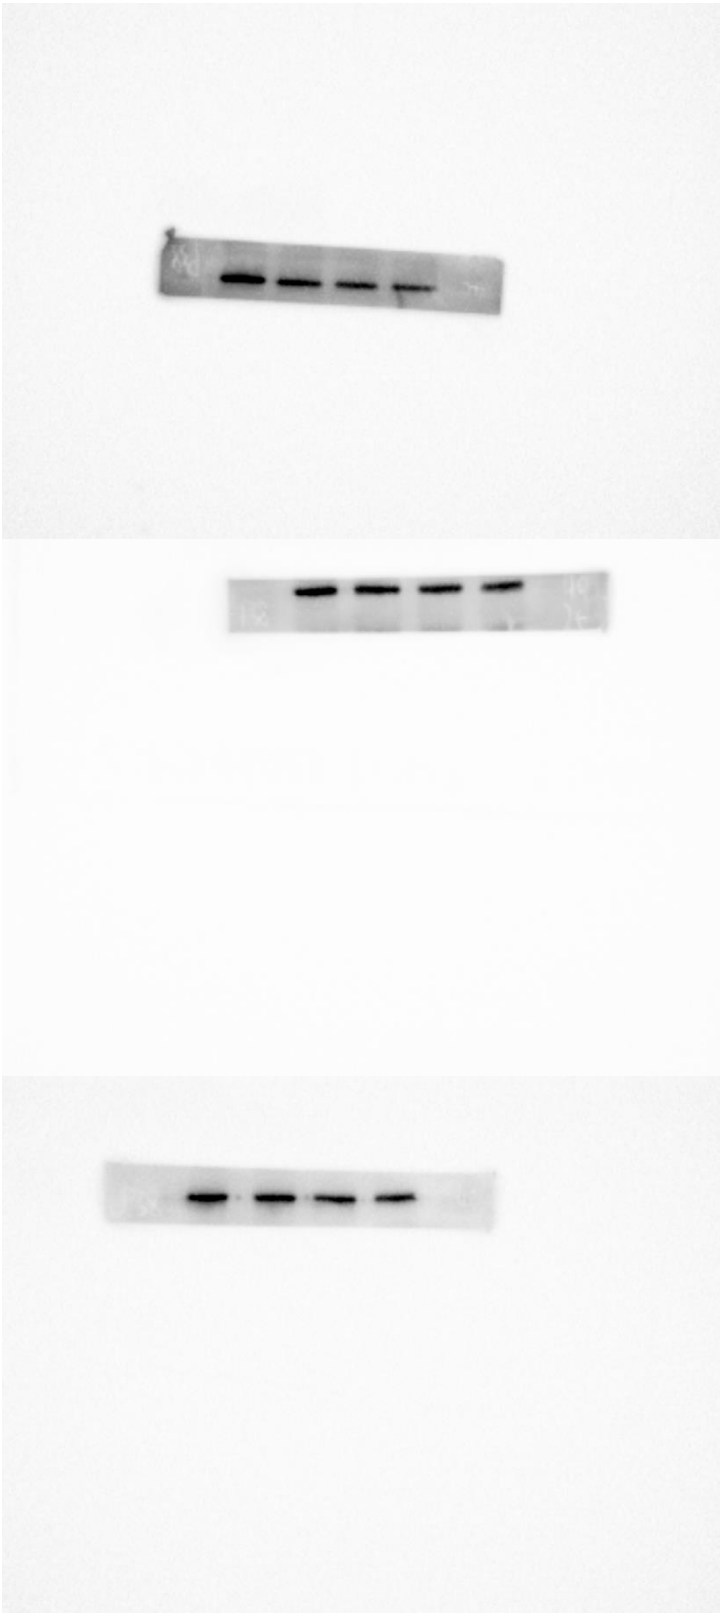

JNK

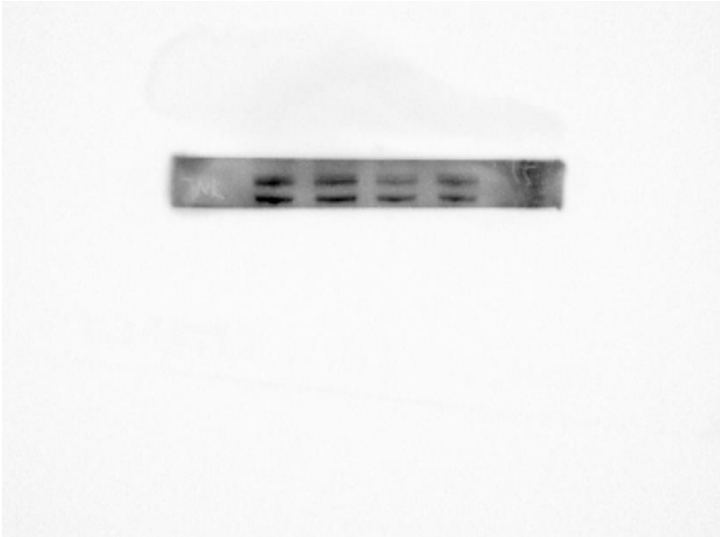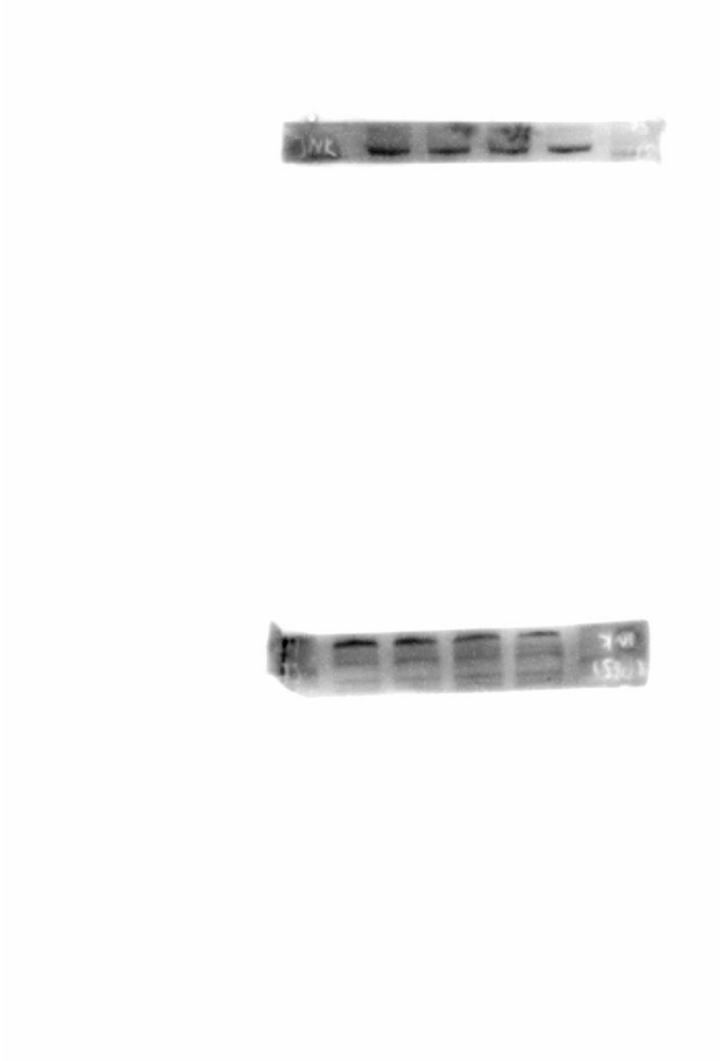

Supplement: Data_Sheet_1.pdf [file Data_Sheet_1.pdf]
